# Supplementary material for: Increased Protein Insolubility in Brains From a Subset of Patients With Schizophrenia
Source: Atypon-hosted journal article supplement (doi:10.1176/appi.ajp.2019.18070864), 2019-05-06

## Supplemental Tables

**TABLE S1.** Baseline demographic and population descriptors of brains (Harvard Brain Tissue Resource Center)

| Characteristic   | Mean (SD) or N (%) |            | p*    |
|------------------|--------------------|------------|-------|
|                  | Control (N=4)      | SCZ (N=5)  |       |
| Age (mean years) | 54.3 (2.9)         | 54.2 (3.5) | 0.982 |
| Sex (N)          |                    |            | 0.524 |
| Male             | 2 (50)             | 4 (80)     |       |
| Female           | 2 (50)             | 1 (20)     |       |
| PMI (mean hours) | 25.0 (5.6)         | 21.9 (1.2) | 0.252 |

\*T-test if mean, Fisher's Exact if proportion.

**TABLE S2A.** Results by cluster for all brains (Harvard Brain Tissue Resource Center)

| Characteristic   | Positive <sup>1</sup> Vs. Negative Cluster |                |       |
|------------------|--------------------------------------------|----------------|-------|
|                  | Mean (SD) or N (%)                         |                | p*    |
|                  | Negative (N=7)                             | Positive (N=2) |       |
| Group (N)        |                                            |                | 0.444 |
| Control          | 4 (57.1)                                   | 0              |       |
| Schizophrenia    | 3 (42.9)                                   | 2 (100.0)      |       |
| Age (mean years) | 53.9 (3.4)                                 | 55.5 (0.7)     | 0.536 |
| Sex (N)          |                                            |                | 0.107 |
| Male             | 5 (71.4)                                   | 1 (50)         |       |
| Female           | 2 (28.6)                                   | 1 (50)         |       |
| PMI (mean hours) | 23.7 (4.4)                                 | 21.9 (0.1)     | 0.612 |

\*T-test if mean, Fisher's Exact if proportion; 1. Clusters determined using hierarchical analysis

**TABLE S2B.** Results by cluster for brains from only schizophrenia patients (Harvard Brain Tissue Resource Center)

| Characteristic   | Positive <sup>1</sup> Vs. Negative Cluster |                            |       |
|------------------|--------------------------------------------|----------------------------|-------|
|                  | Mean (SD) or N (%)                         |                            | p*    |
|                  | Cluster 1 (Negative) (N=3)                 | Cluster 2 (Positive) (N=2) |       |
| Age (mean years) | 53.3 (4.6)                                 | 55.5 (0.7)                 | 0.576 |
| Sex (N)          |                                            |                            | 0.400 |
| Male             | 3 (100.0)                                  | 1 (50)                     |       |
| Female           | 0                                          | 1 (50)                     |       |
| PMI (mean hours) | 21.8 (1.8)                                 | 21.9 (0.1)                 | 0.952 |

\*T-test if mean, Fisher's Exact if proportion; 1. Clusters determined using hierarchical analysis

**TABLE S3.** Baseline demographic and population descriptors of brains (University of Pittsburgh Brain Bank)

| Characteristic                                | Mean (SD) or N (%) |              | p*     |
|-----------------------------------------------|--------------------|--------------|--------|
|                                               | Control (N=19)     | SCZ (N=19)   |        |
| Age (mean years)                              | 45.6 (10.9)        | 48.7 (12.7)  | 0.417  |
| Sex (N)                                       |                    |              |        |
| Male                                          | 14 (73.7)          | 14 (73.7)    | 1.000  |
| Female                                        | 5 (26.3)           | 5 (26.3)     |        |
| Race (N)                                      |                    |              |        |
| White                                         | 14 (73.7)          | 12 (63.2)    | 0.476  |
| Black                                         | 4 (21.0)           | 7 (36.8)     |        |
| Other                                         | 1 (5.3)            | 0            |        |
| Medication Use (N)                            |                    |              |        |
| Any                                           | 10 (52.6)          | 18 (94.7)    | 0.008  |
| Antipsychotic                                 | 0                  | 16 (84.2)    | <0.001 |
| Anticonvulsant                                | 0                  | 5 (26.3)     | 0.046  |
| Antidepressant                                | 0                  | 8 (42.1)     | 0.003  |
| Benzodiazepine                                | 0                  | 2 (10.5)     | 0.486  |
| Other                                         | 10                 | 13 (68.4)    | 0.508  |
| PMI (mean hours)                              | 17.6 (6.7)         | 18.2 (7.7)   | 0.784  |
| RIN (mean)                                    | 8.3 (0.4)          | 8.1 (0.6)    | 0.288  |
| Brain pH (mean)                               | 6.7 (0.2)          | 6.5 (0.3)    | 0.006  |
| Storage (mean months)                         | 153.4 (44.9)       | 145.5 (37.5) | 0.561  |
| *T-test if mean, Fisher's Exact if proportion |                    |              |        |

**TABLE S4.** Baseline demographic and population descriptors of brains (University of Texas Southwestern Medical Center)

| Characteristic                                | Mean (SD) or N (%) |              | p*     |
|-----------------------------------------------|--------------------|--------------|--------|
|                                               | Control (N=18)     | SCZ (N=18)   |        |
| Age (mean years)                              | 51 (14.7)          | 50.7 (15.2)  | 0.956  |
| Sex (N)                                       |                    |              | 1.000  |
| Male                                          | 12 (66.7)          | 11 (61.1)    |        |
| Female                                        | 6 (33.3)           | 7 (38.9)     |        |
| Race (N)                                      |                    |              | 0.308  |
| White                                         | 16 (88.9)          | 13 (72.2)    |        |
| Black                                         | 0                  | 3 (16.7)     |        |
| Other                                         | 2 (11.1)           | 2 (11.1)     |        |
| Medications Use (N)                           |                    |              |        |
| Any                                           | 10 (55.6)          | 15 (83.3)    | 0.146  |
| Antipsychotic                                 | 0                  | 13 (72.2)    | <0.001 |
| Anticonvulsant                                | 0                  | 5 (27.8)     | 0.045  |
| Antidepressant                                | 0                  | 8 (44.4)     | 0.003  |
| Benzodiazepine                                | 0                  | 5 (27.8)     | 0.045  |
| Other                                         | 10 (55.6)          | 11 (61.1)    | 1.000  |
| PMI (mean hours)                              | 19.0 (6.7)         | 18.9 (8.4)   | 0.991  |
| RIN (mean)                                    | 8.5 (0.9)          | 8.7 (1.1)    | 0.601  |
| Brain pH (mean)                               | 6.5 (0.4)          | 6.6 (0.3)    | 0.533  |
| Storage (mean months)                         | 143.8 (19.5)       | 152.0 (22.4) | 0.246  |
| *T-test if mean, Fisher's Exact if proportion |                    |              |        |

**TABLE S5.** Baseline demographic and population descriptors of brains from all three studies combined (Harvard Brain Tissue Resource Center, University of Pittsburgh Brain Bank, and University of Texas Southwestern Medical Center)

| Characteristic                                                                                                                  | Mean (SD) or N (%)          |                         | p*     |
|---------------------------------------------------------------------------------------------------------------------------------|-----------------------------|-------------------------|--------|
|                                                                                                                                 | Control<br>(N=37,<br>^N=41) | SCZ<br>(N=37,<br>^N=42) |        |
| Age (mean years <sup>^</sup> )                                                                                                  | 48.8 (12.5)                 | 50.2 (13.1)             | 0.611  |
| Sex (N <sup>^</sup> )                                                                                                           |                             |                         | 1.00   |
| Male                                                                                                                            | 28 (68.3)                   | 29 (69.1)               |        |
| Female                                                                                                                          | 13 (31.7)                   | 13 (30.9)               |        |
| Race (N)                                                                                                                        |                             |                         | 0.211  |
| White                                                                                                                           | 30 (81.1)                   | 25 (67.6)               |        |
| Black                                                                                                                           | 4 (10.8)                    | 10 (27.0)               |        |
| Other                                                                                                                           | 3 (8.1)                     | 2 (5.4)                 |        |
| Medication Use (N)                                                                                                              |                             |                         |        |
| Any                                                                                                                             | 20 (54.1)                   | 33 (89.2)               | 0.002  |
| Antipsychotic                                                                                                                   | 0                           | 29 (78.4)               | <0.001 |
| Anticonvulsant                                                                                                                  | 0                           | 10 (27.0)               | 0.001  |
| Antidepressant                                                                                                                  | 0                           | 16 (43.2)               | <0.001 |
| Benzodiazepine                                                                                                                  | 0                           | 7 (18.9)                | 0.011  |
| Other                                                                                                                           | 20 (54.1)                   | 24 (64.9)               | 0.478  |
| PMI (mean hours <sup>^</sup> )                                                                                                  | 18.9 (6.8)                  | 19.0 (7.5)              | 0.975  |
| RIN, mean                                                                                                                       | 8.4 (0.7)                   | 8.4 (0.9)               | 0.944  |
| Brain pH (mean)                                                                                                                 | 6.6 (0.3)                   | 6.5 (0.3)               | 0.211  |
| Storage (mean months)                                                                                                           | 148.7 (34.8)                | 148.7 (30.8)            | 0.998  |
| ^Larger Ns were available for data that were available from all three data sets.; *T-test if mean, Fisher's Exact if proportion |                             |                         |        |

**TABLE S6. Mass spectrometry quantification: complete data set.***(See the Excel spreadsheet in a separate supplemental file.)***TABLE S7.** Identification of proteins significantly enriched at several stages of the ubiquitination process in the insoluble fraction, from brains with increased protein insolubility and ubiquitination compared to those without.

|               |                                          |
|---------------|------------------------------------------|
| Activation    | FXBO3, UBA1, UBA6, STUB1                 |
| Conjugation   | HUWE1, TRIM36, UBE2D3, ATG3, LRSAM1      |
| Proteolysis   | PSMC2, PSMC5, PSMD12                     |
| Deconjugation | OTUB1, USP9X, USP11, USP14, UCHL1, UCHL5 |

**TABLE S8.** Results from cell type enrichment analysis

| <b>RNA-Seq Data Set</b> | <b>Cell Type</b>  | <b>SD</b> | <b>p</b> | <b>FDR</b> |
|-------------------------|-------------------|-----------|----------|------------|
| Darmanis                | Neurons           | 10.62     | <0.0001  | <0.0001    |
| Darmanis                | Oligodendrocytes  | 2.10      | 0.021    | 0.062      |
| Darmanis                | OPCs              | -6.14     | 1.000    | 1.000      |
| Darmanis                | Astrocytes        | -0.07     | 0.519    | 1.000      |
| Darmanis                | Microglia         | -4.95     | 1.000    | 1.000      |
| Darmanis                | Endothelial cells | -0.66     | 0.740    | 1.000      |
| Lake                    | In1               | -2.14     | 0.986    | 1.000      |
| Lake                    | In2               | 0.01      | 0.486    | 1.000      |
| Lake                    | In3               | -2.93     | 0.999    | 1.000      |
| Lake                    | In4               | 1.64      | 0.052    | 0.139      |
| Lake                    | In5               | -1.06     | 0.858    | 1.000      |
| Lake                    | In6               | 2.82      | 0.005    | 0.015      |
| Lake                    | In7               | -3.22     | 1.000    | 1.000      |
| Lake                    | In8               | -0.53     | 0.700    | 1.000      |
| Lake                    | Ex1               | 2.96      | 0.002    | 0.009      |
| Lake                    | Ex2               | -0.59     | 0.715    | 1.000      |
| Lake                    | Ex3               | 6.11      | <0.0001  | <0.0001    |
| Lake                    | Ex4               | 4.03      | <0.0001  | <0.0001    |
| Lake                    | Ex5               | 2.94      | 0.002    | 0.009      |
| Lake                    | Ex6               | -2.37     | 0.993    | 1.000      |
| Lake                    | Ex7               | -0.23     | 0.583    | 1.000      |
| Lake                    | Ex8               | -1.24     | 0.894    | 1.000      |

## Supplemental Figures

**FIGURE S1, A–E.** Cold sarkosyl fractionation was used to obtain insoluble protein fractions from five schizophrenia patients and four controls from the Harvard Brain Tissue Resource Center for our pilot study. (A) When insolubility and ubiquitination were jointly analyzed, there was a group of patients with schizophrenia that separated from all other patients and controls. Controls are in blue and patients are in red. (B) Hierarchical clustering analysis determined that two of the schizophrenia patients (S41 and S42, Cluster 2) clustered separately from all other patients and controls. (C) Patients in Cluster 2 have significantly more protein insolubility than the patients and controls in Cluster 1 ( $p < 0.001$ ). (D) The patients in Cluster 2 were also significantly different than the patients and controls in Cluster 1 based on the amount of ubiquitination in the insoluble fraction ( $p < 0.001$ ). Blue represents controls with low levels of the markers, pink indicates patients with low levels of the markers, and red indicates patients with high levels of the markers, based on hierarchical cluster analysis. (E) The ubiquitination was strikingly higher in the subset of patient brains from Cluster 2 than in the brains of the other patients or of controls in Cluster 1.

**FIGURE S1A:** Comparison of Protein Insolubility to Ubiquitin Reactivity (Harvard Brain Tissue Resource Center )

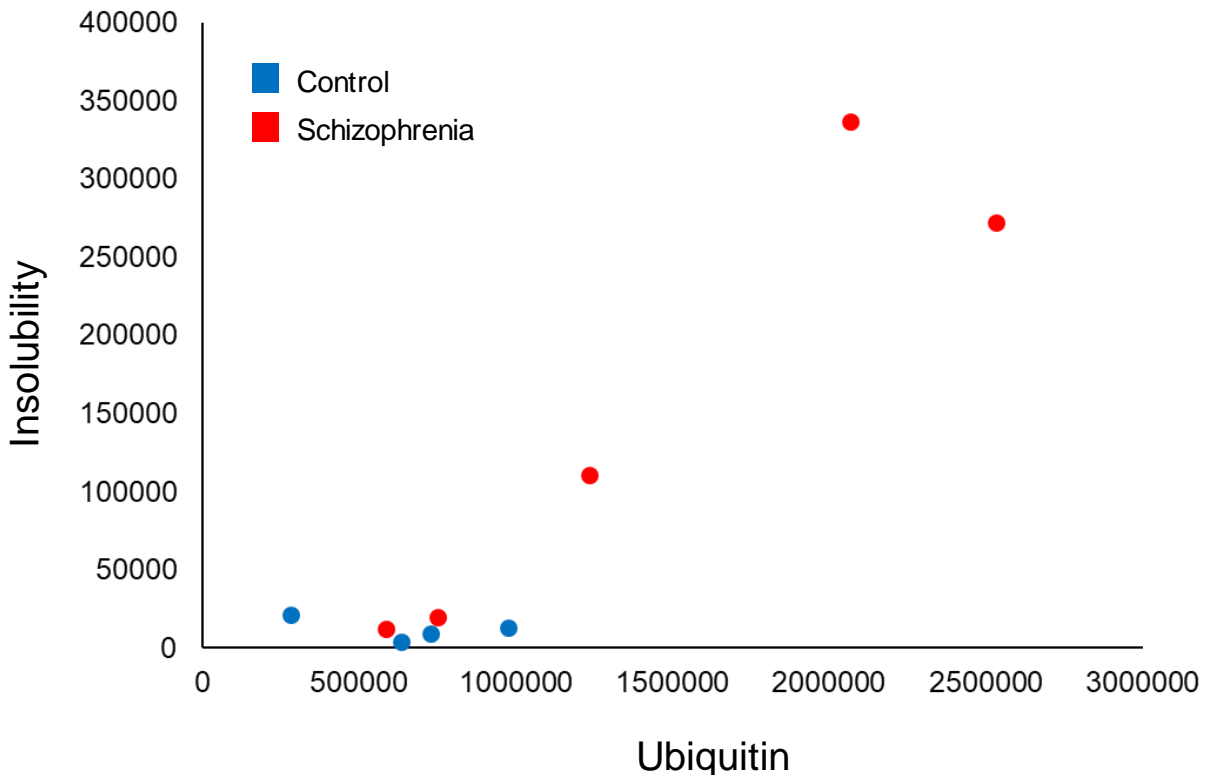

**FIGURE S1B:** Hierarchical Cluster Analysis (Harvard Brain Tissue Resource Center)

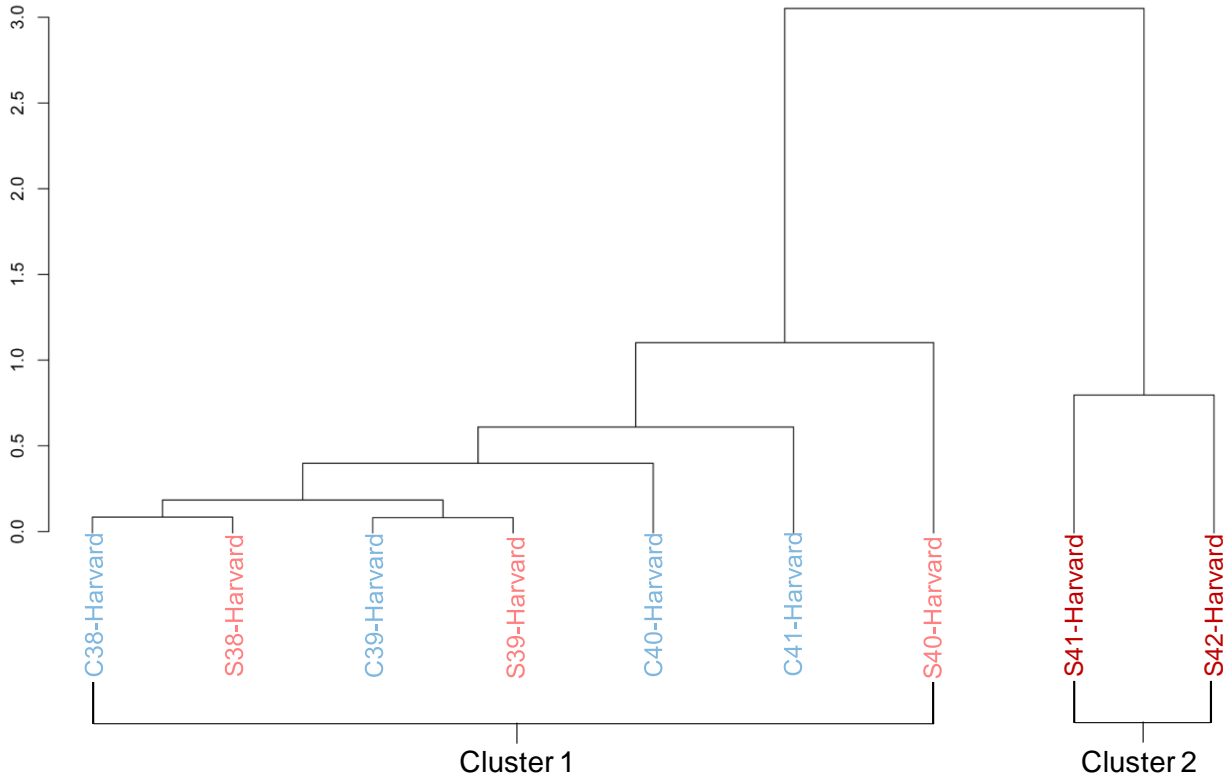



**FIGURE S1C and D:** Increased Ratio of Insoluble to Total Protein and Ubiquitination in a Subset of Schizophrenia Brains Compared with Controls (Harvard Brain Tissue Resource Center)

**C**

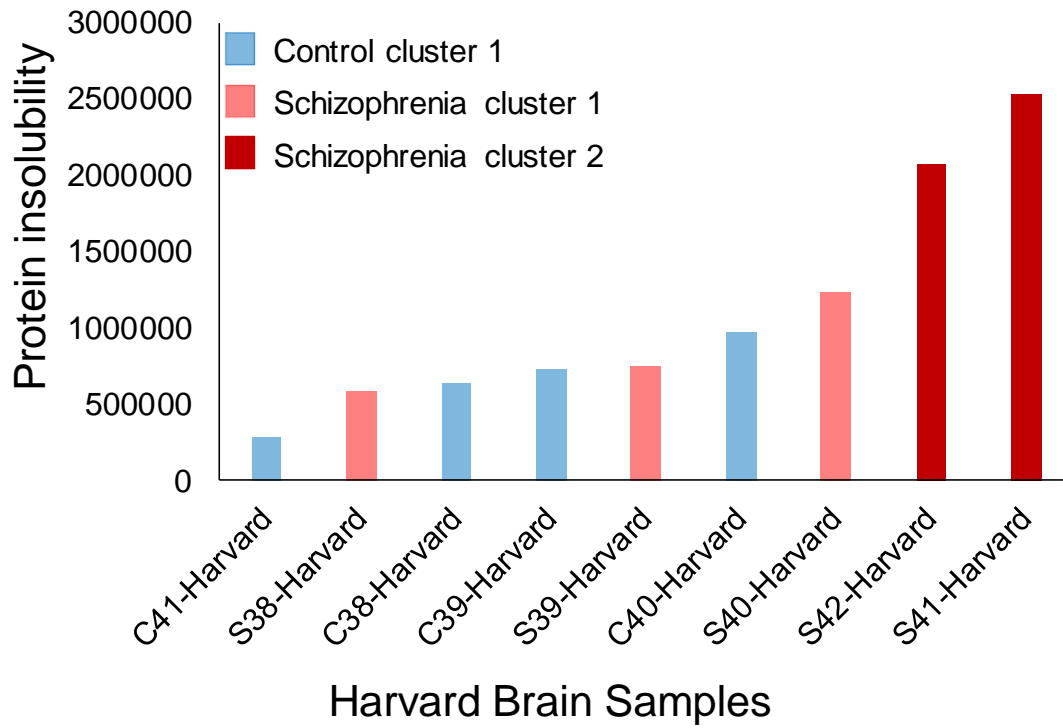

D

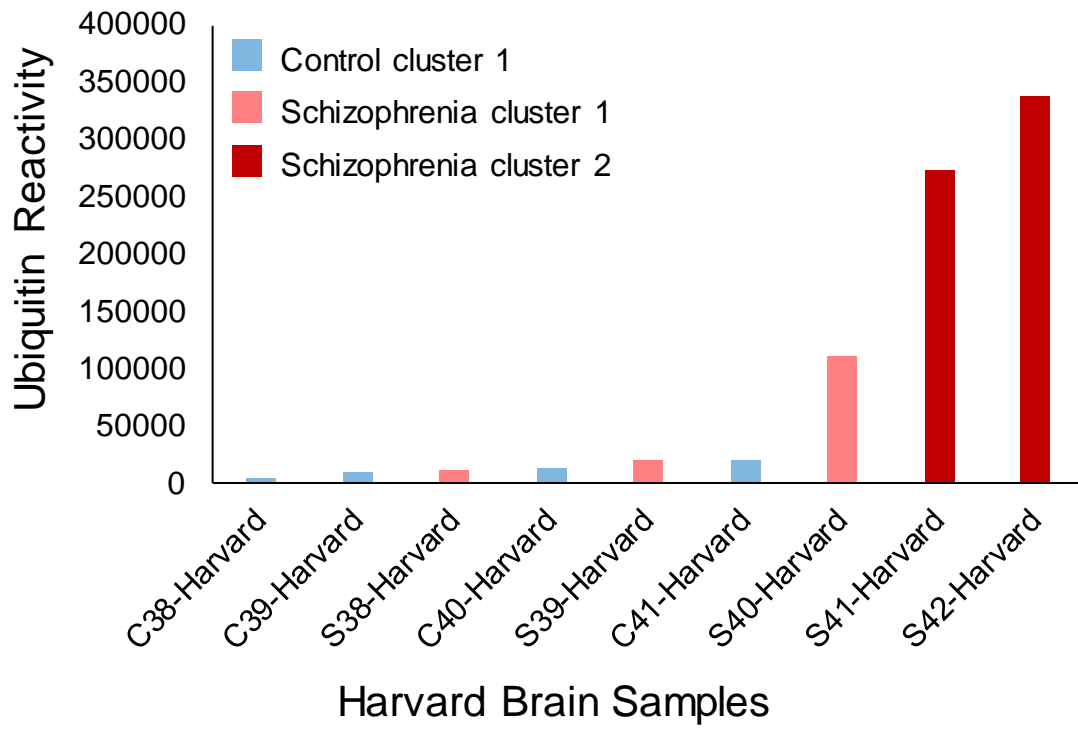

**FIGURE S1E.** Ubiquitination Western Blot (Harvard Brain Tissue Resource Center)

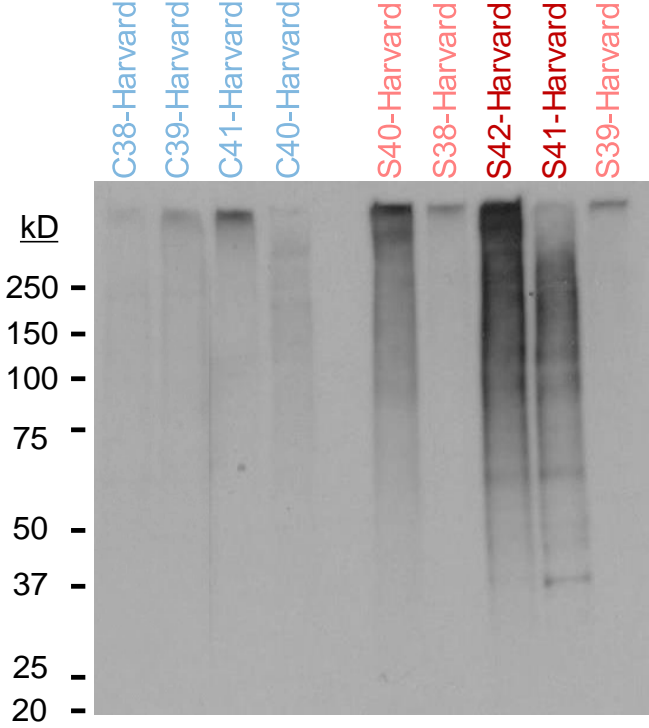

**FIGURE S2.** The total amount of starting material was not significantly different when the mean of three representative patients with increased protein insolubility was compared to the mean of three representative controls. The data detect an overall shift in the amount of protein from the soluble fraction to the insoluble fraction, with the patients having significantly more protein in the insoluble fraction and significantly less protein in the soluble fraction compared to the controls. When the soluble and insoluble fractions values were combined, they added back to approximately the same amount of total starting material. \*\*denotes  $p < 0.001$ , NS denotes not statistically significant.

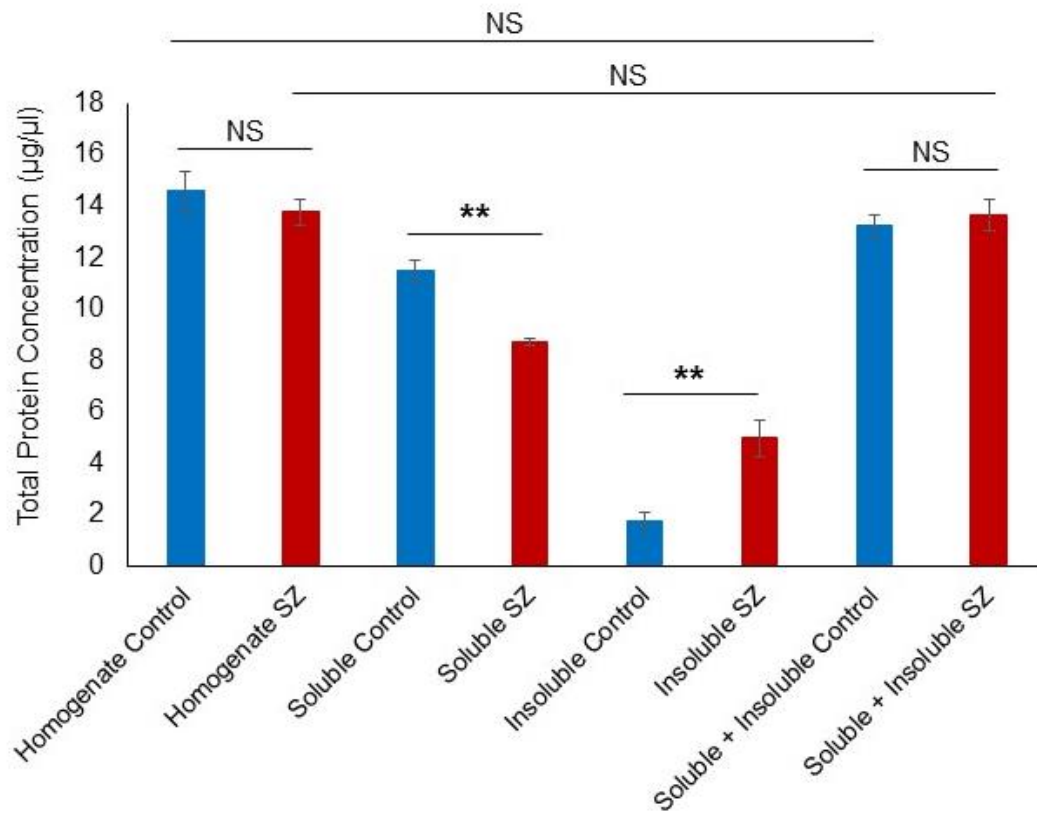

**FIGURE S3. Protein insolubility and ubiquitination are not caused by antipsychotics.** We performed the sarkosyl fractionation protocol on brains from rats that were subjected to 4.5 months of oral haloperidol, risperidone or water. (A) There was not a significant effect on the amount of protein insolubility for the three conditions by one-way ANOVA ( $p=0.961$ ). (B) There was not a significant effect on the amount of ubiquitination for the three conditions by one-way ANOVA ( $p=0.598$ ). NS denotes not statistically significant.

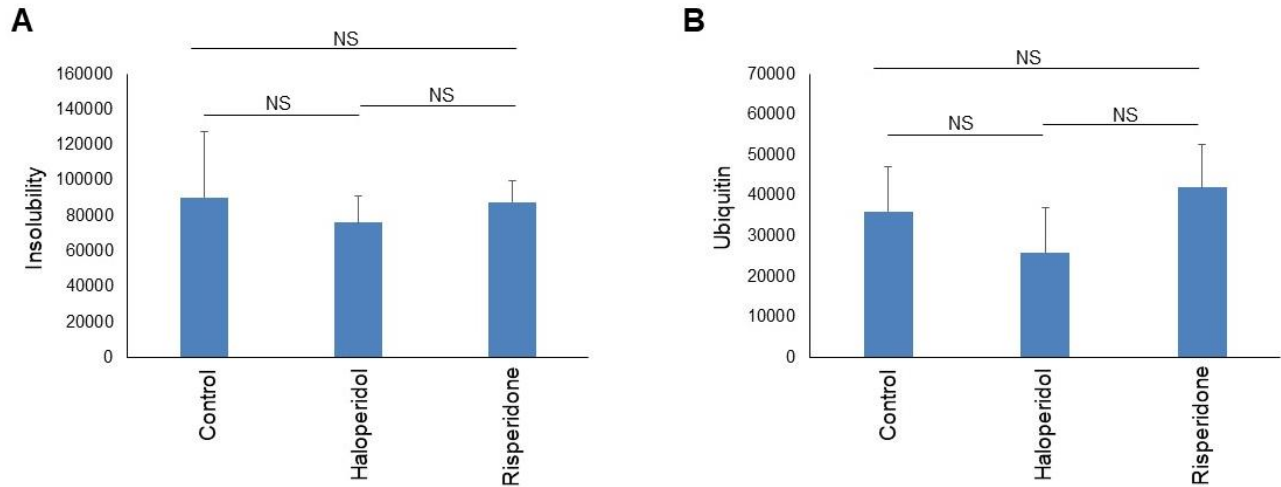

**FIGURE S4. Biological processes and pathways associated with protein insolubility.** (A) Gene set enrichment analysis identified axon target recognition as the Gene Ontology (GO) biological process most enriched for insoluble proteins. (B) Pathway analysis revealed the most significant enrichment for insoluble proteins in neurological disease for the disease and disorder category, cell assembly and organization for the molecular and cellular function category, and nervous system development and function for the physiological system development and function category.

**A. Gene Ontology Enrichment**

| GO biological process                                   | #     | #   | expected | Fold enrich-ment | +/- | raw p-value | FDR      |
|---------------------------------------------------------|-------|-----|----------|------------------|-----|-------------|----------|
| Axon target recognition                                 | 3     | 2   | 0.02     | 82.52            | +   | 6.28E-04    | 2.40E-02 |
| └ Cellular process                                      | 15437 | 157 | 124.72   | 1.26             | +   | 7.27E-10    | 5.67E-07 |
| └ Axonogenesis                                          | 372   | 11  | 3.01     | 3.66             | +   | 2.75E-04    | 1.27E-02 |
| └ Axon development                                      | 403   | 11  | 3.26     | 3.38             | +   | 5.29E-04    | 2.12E-02 |
| └ Neuron projection development                         | 663   | 17  | 5.36     | 3.17             | +   | 3.47E-05    | 2.52E-03 |
| └ Plasma membrane bounded cell projection organization  | 1097  | 28  | 8.86     | 3.16             | +   | 8.67E-08    | 2.51E-05 |
| └ Cell projection organization                          | 1132  | 28  | 9.15     | 3.06             | +   | 1.63E-07    | 3.69E-05 |
| └ Cellular component organization                       | 5565  | 83  | 44.96    | 1.85             | +   | 7.63E-10    | 5.67E-07 |
| └ Cellular component organization or biogenesis         | 5795  | 86  | 46.82    | 1.84             | +   | 2.53E-10    | 2.20E-07 |
| └ Neuron development 21                                 | 807   | 18  | 6.52     | 2.76             | +   | 1.17E-04    | 6.56E-03 |
| └ Cell development 26                                   | 1572  | 30  | 12.70    | 2.36             | +   | 1.22E-05    | 1.02E-03 |
| └ Cell differentiation 32                               | 3610  | 53  | 29.17    | 1.82             | +   | 8.63E-06    | 7.61E-04 |
| └ Cellular developmental process 37                     | 3698  | 54  | 29.88    | 1.81             | +   | 6.98E-06    | 6.72E-04 |
| └ Developmental process 44                              | 5618  | 75  | 45.39    | 1.65             | +   | 1.28E-06    | 1.78E-04 |
| └ Anatomical structure development 32                   | 5253  | 71  | 42.44    | 1.67             | +   | 1.88E-06    | 2.31E-04 |
| └ Neuron differentiation 26                             | 992   | 22  | 8.01     | 2.75             | +   | 2.11E-05    | 1.67E-03 |
| └ Generation of neurons                                 | 1473  | 34  | 11.90    | 2.86             | +   | 3.19E-08    | 1.16E-05 |
| └ Neurogenesis                                          | 1572  | 36  | 12.70    | 2.83             | +   | 1.40E-08    | 6.06E-06 |
| └ Nervous system development                            | 2287  | 50  | 18.48    | 2.71             | +   | 4.16E-11    | 4.32E-08 |
| └ System development                                    | 4272  | 65  | 34.51    | 1.88             | +   | 8.76E-08    | 2.49E-05 |
| └ Multicellular organism development                    | 4888  | 68  | 39.49    | 1.72             | +   | 1.56E-06    | 2.02E-04 |
| └ Multicellular organismal process                      | 6790  | 83  | 54.86    | 1.51             | +   | 1.06E-05    | 9.10E-04 |
| └ Neuron projection morphogenesis                       | 487   | 12  | 3.93     | 3.05             | +   | 7.18E-04    | 2.65E-02 |
| └ Plasma membrane bounded cell projection morphogenesis | 491   | 12  | 3.97     | 3.03             | +   | 7.69E-04    | 2.82E-02 |
| └ Cell projection morphogenesis                         | 494   | 12  | 3.99     | 3.01             | +   | 8.10E-04    | 2.92E-02 |
| └ Cellular component morphogenesis                      | 791   | 16  | 6.39     | 2.50             | +   | 7.98E-04    | 2.90E-02 |
| └ Cell part morphogenesis                               | 514   | 13  | 4.15     | 3.13             | +   | 3.40E-04    | 1.49E-02 |
| └ Cell morphogenesis involved in neuron differentiation | 433   | 11  | 3.50     | 3.14             | +   | 9.39E-04    | 3.22E-02 |
| └ Cell morphogenesis involved in differentiation        | 533   | 13  | 4.31     | 3.02             | +   | 4.75E-04    | 1.94E-02 |

## B. Ingenuity Pathway Analysis

| <b>Diseases and Disorders</b>                        | <b>p-value range</b> | <b># molecules</b> |
|------------------------------------------------------|----------------------|--------------------|
| Neurological disease                                 | 3.82E-09 ~ 7.56E-49  | 457                |
| Cancer                                               | 4.10E-09 ~ 1.11E-47  | 847                |
| Organismal injury and abnormalities                  | 4.10E-09 ~ 1.11E-47  | 856                |
| Psychological disorders                              | 4.53E-09 ~ 3.83E-47  | 267                |
| Gastrointestinal disease                             | 3.18E-09 ~ 1.51E-44  | 798                |
| <b>Molecular and Cellular Functions</b>              | <b>p-value range</b> | <b># molecules</b> |
| Cellular assembly and organization                   | 4.61E-09 ~ 1.73E-75  | 398                |
| Cellular function and maintenance                    | 4.61E-09 ~ 1.73E-75  | 448                |
| Cell morphology                                      | 3.46E-09 ~ 4.65E-62  | 324                |
| Cellular development                                 | 6.08E-09 ~ 4.65E-62  | 326                |
| Cellular growth and proliferation                    | 6.08E-09 ~ 4.65E-62  | 325                |
| <b>Physiological System Development and Function</b> | <b>p-value range</b> | <b># molecules</b> |
| Nervous system development and function              | 4.55E-09 ~ 4.65E-62  | 365                |
| Organismal development                               | 3.90E-09 ~ 4.65E-62  | 348                |
| Tissue development                                   | 4.61E-09 ~ 4.65E-62  | 298                |
| Tissue morphology                                    | 2.29E-09 ~ 1.77E-48  | 257                |
| Embryonic development                                | 3.90E-09 ~ 8.47E-42  | 224                |

**FIGURE S5. Cell type enrichment of insoluble proteins.** Using the Darmanis et al. RNA-seq dataset, insoluble proteins were found to be significantly enriched in neurons. Neuron subtype analysis, using the Lake et al. RNA-seq dataset, revealed significant enrichment of insoluble proteins in one inhibitory subtype (In6) and four excitatory subtypes (Ex1, Ex3, Ex4, and Ex5). Insoluble proteins were not significantly enriched in oligodendrocytes, oligodendrocyte progenitor cells (OPC), astrocytes, microglia, or endothelial cells. \* Significant (FDR<0.05); SD=Standard deviations from the bootstrapped mean (N=20,000 bootstraps); In=Inhibitory neurons; Ex=Excitatory neurons.

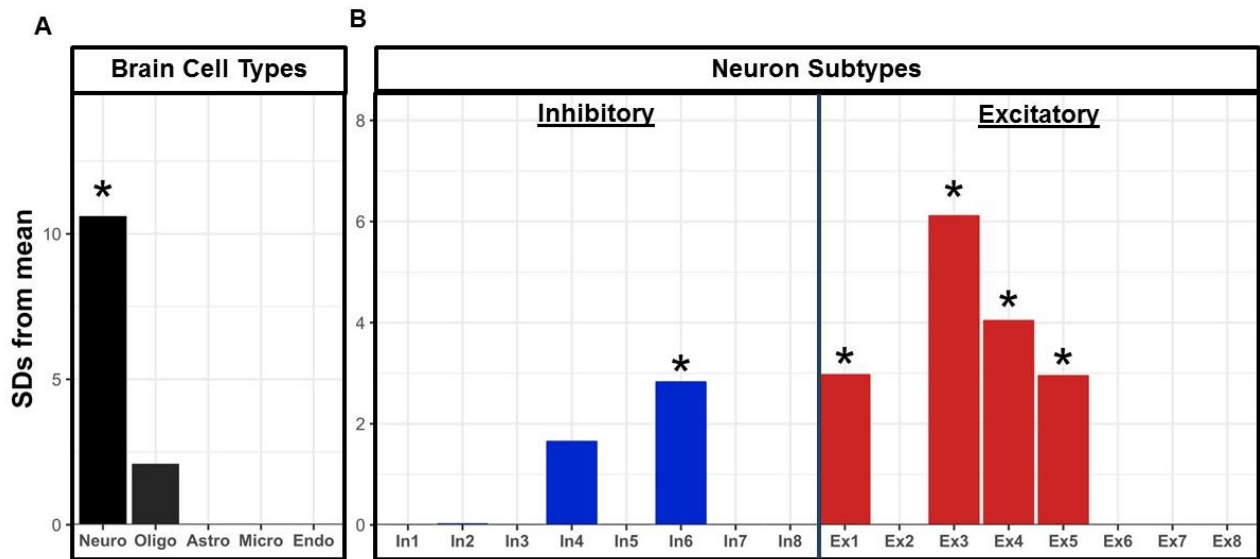

Supplement: appi.ajp.2019.18070864.ds001_Tables_Figures.pdf [file appi.ajp.2019.18070864.ds001_Tables_Figures.pdf]
